# Supplementary material
Source: MDPI journal article supplement (https://www.mdpi.com/2073-4395/10/8/1064)

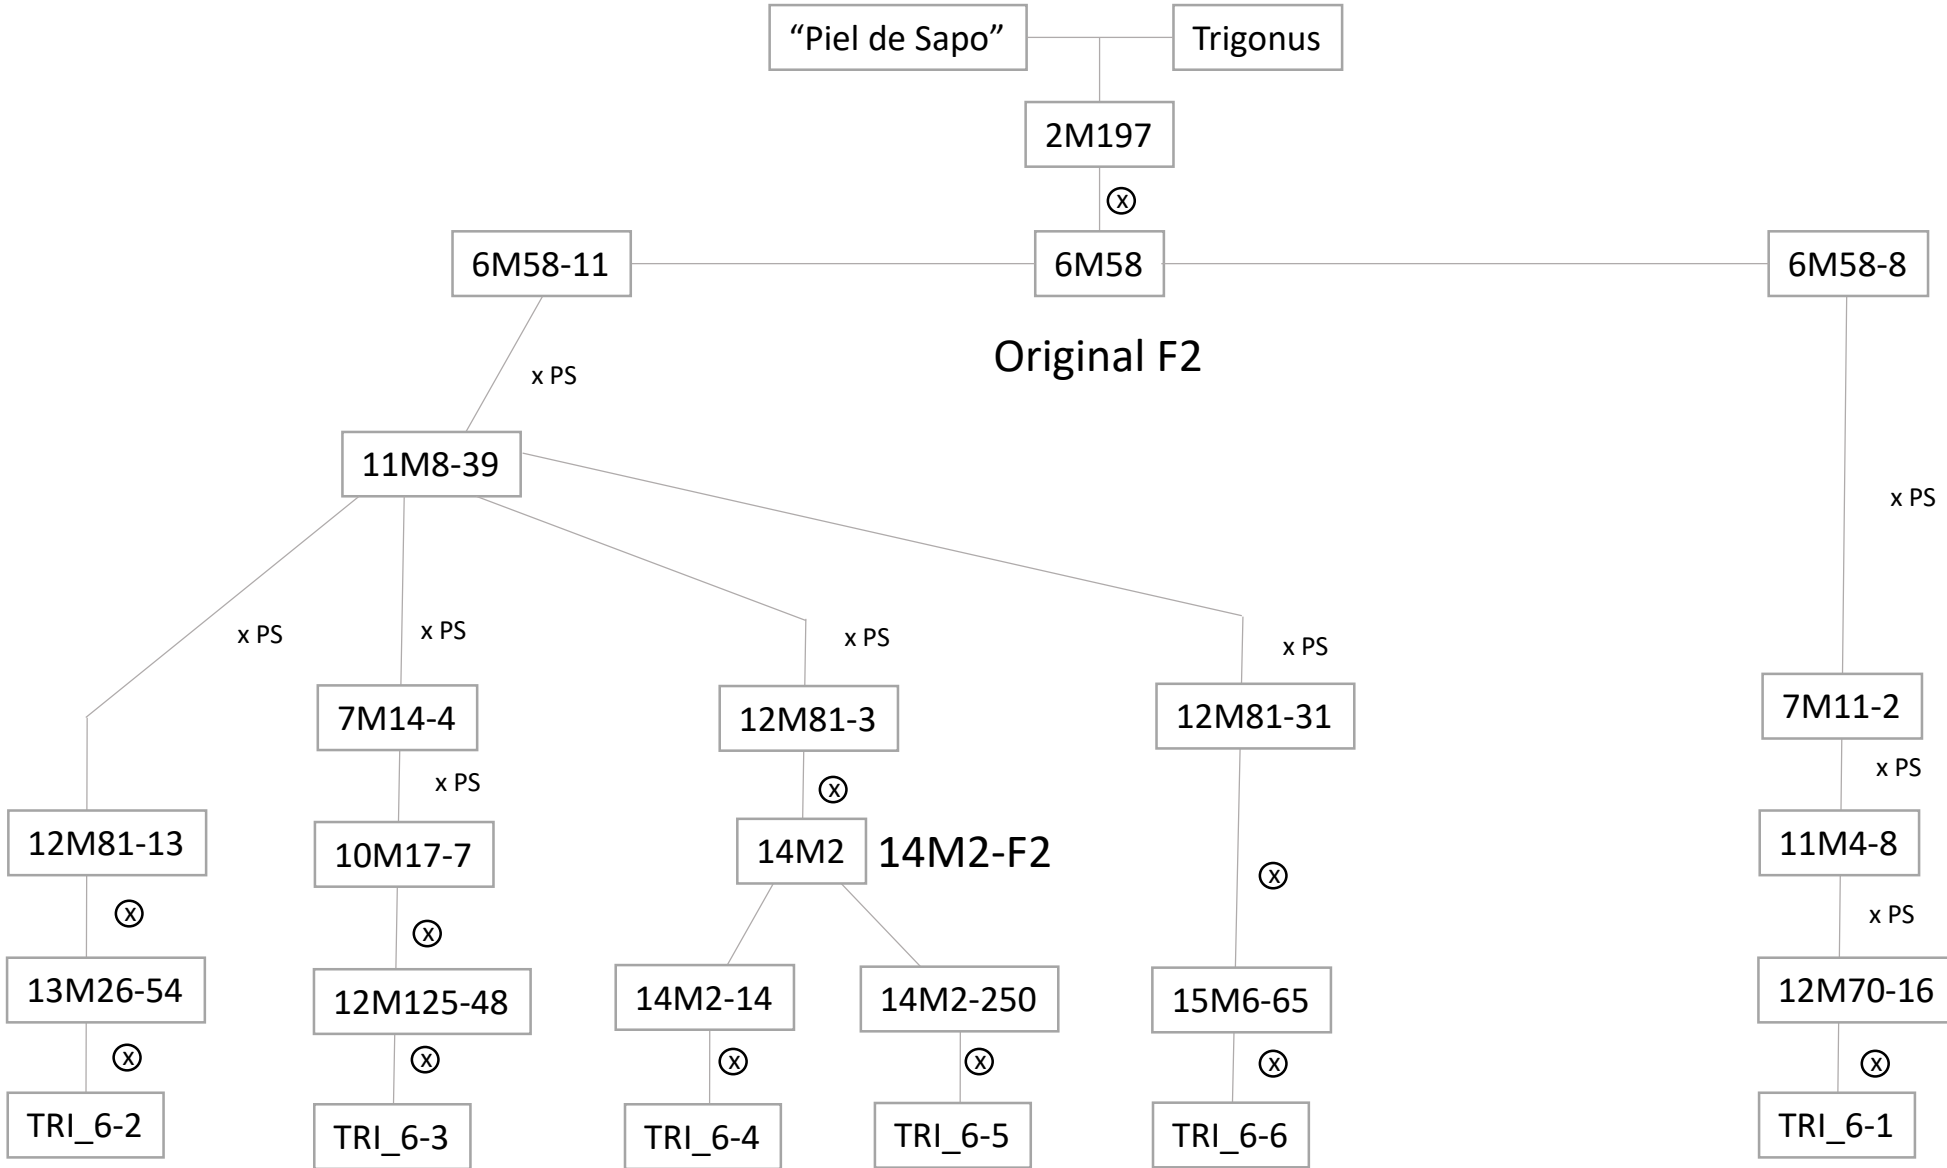

Original F2

14M2-F2

Introgression Lines

Supplement: s1 [file s1]
